# Supplementary material for: Differences in Density Dependence among Tree Mycorrhizal Types Affect Tree Species Diversity and Relative Growth Rates
Source: MDPI journal article supplement (doi:10.3390/plants11182340), 2022-09-07
Supplement: s1 [file s1]

Figure S1. Log-likelihood as a function of exponent  $c$  at 5-30 m across all individuals at sapling and adult life stages. Each point on curve<sub>mean</sub> (black point) is the average value of the log-likelihood at 5-30 m at a certain  $c$ .

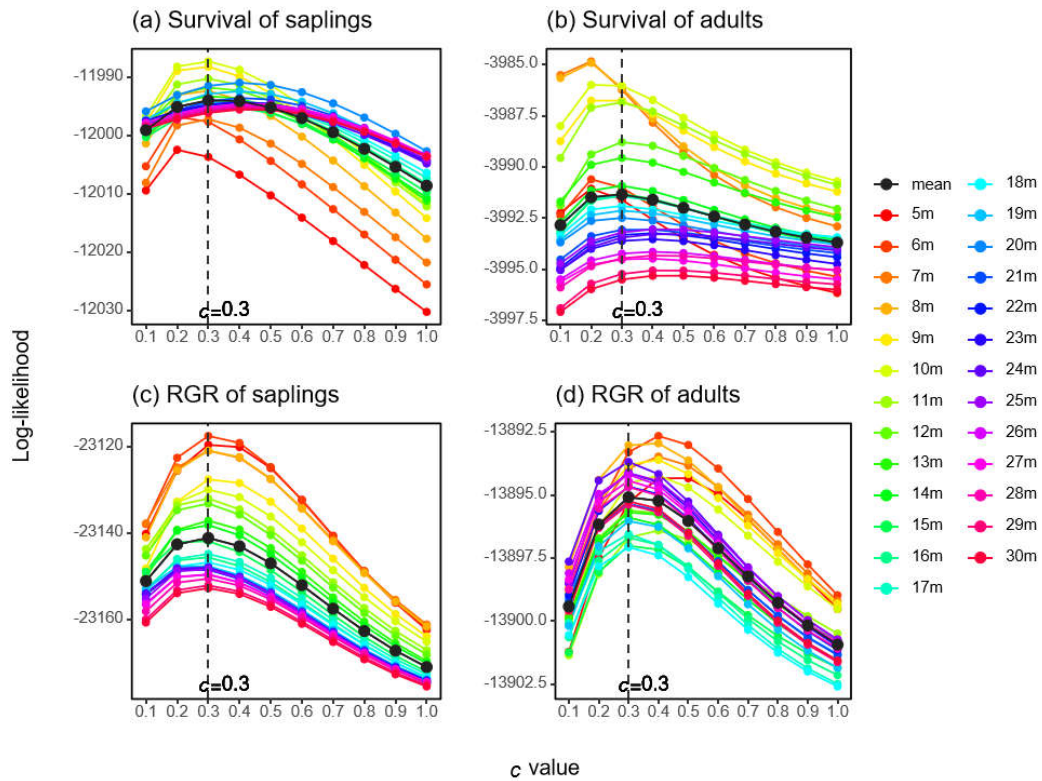

Figure S2. Log-likelihood as a function of exponent  $c$  at 5-30 m in different tree mycorrhizal types at sapling and adult life stages. Each point on curve<sub>mean</sub> (black point) is the average value of the log-likelihood at 5-30 m at a certain  $c$ .

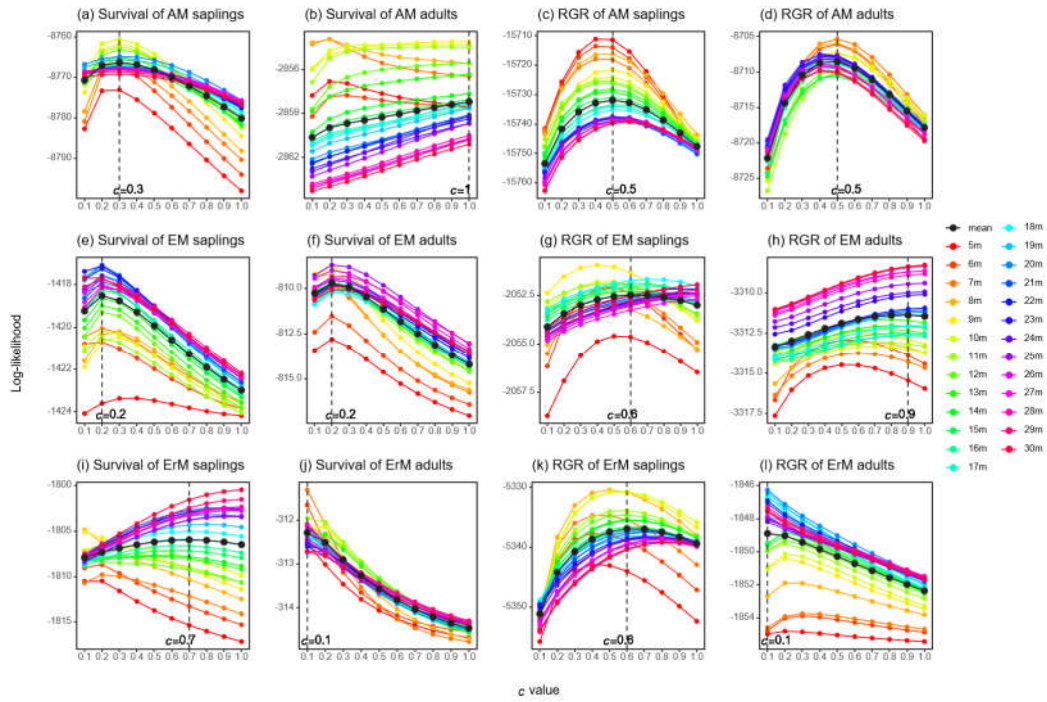

Figure S3. Estimates ( $\pm 2SE$ ) of neighborhood factors on survival (a) and RGR (b) of all individuals at sapling and adult life stages at 5-30 m. Solid circles indicate significant effects ( $P < 0.05$ ), while open circles indicate non-significant effects. Con, conspecific density; HetAM, heterospecific AM density; HetEcM, heterospecific EcM density; HetErM, heterospecific ErM density.

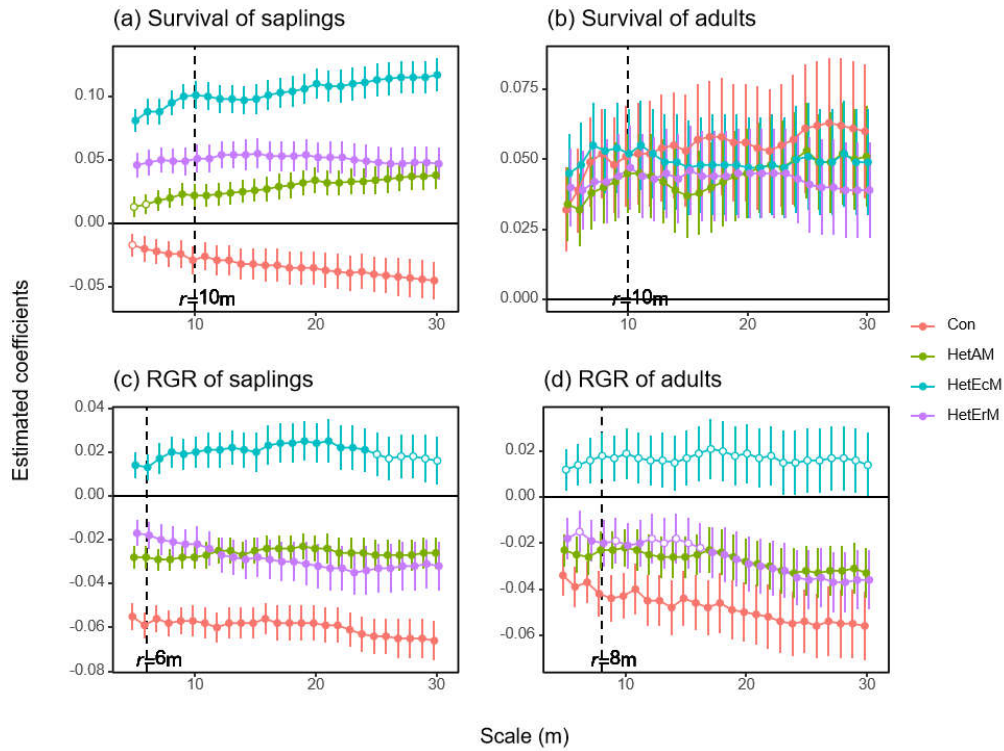

Figure S4. Estimated effects ( $\pm 2SE$ ) of neighborhood factors on survival and RGR of tree mycorrhizal types at sapling and adult life stages at 5-30 m. Solid circles indicate significant effects ( $P < 0.05$ ), while open circles indicate non-significant effects. Con, conspecific density; HetAM, heterospecific AM density; HetEcM, heterospecific EcM density; HetErM, heterospecific ErM density.

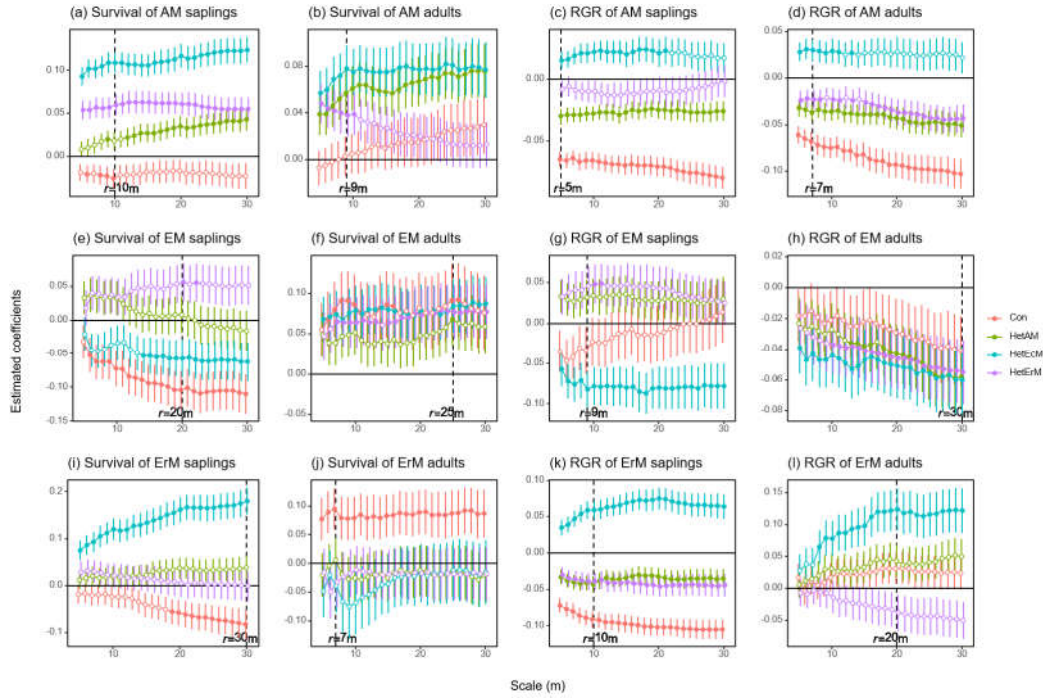

Figure S5. Correlations between BA of EcM species ( $BA_{EcM}$ ) and BA of AM species ( $BA_{AM}$ ) with species diversity ( $H$ , Shannon-Weiner index) (a & e), average RGR (b & f), total BA (c & g) and increment of total BA (d & h).

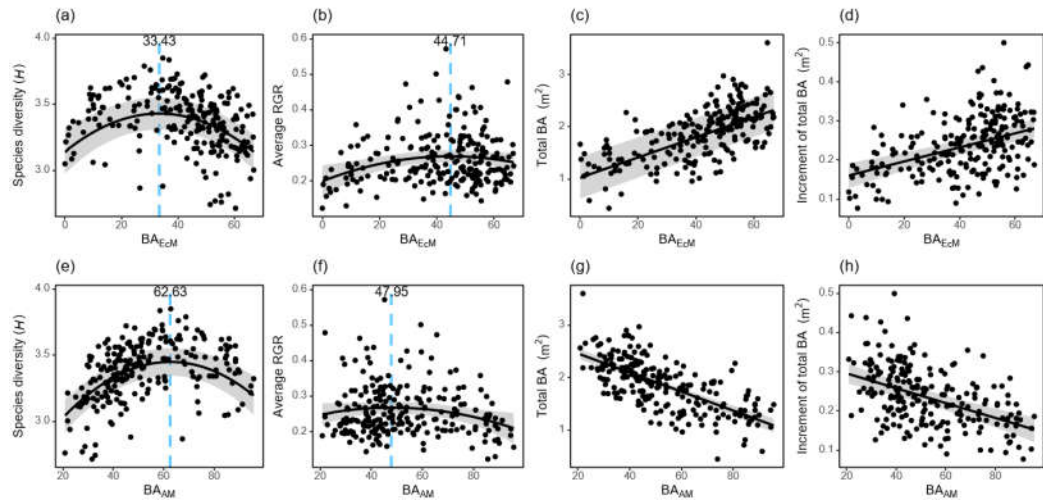

Table S1. 179 focal species used in the analysis of neighborhood effects on survival and growth. (Life form: C=canopy tree species, U=understory tree species, and S=shrub species) in subtropical evergreen broad-leaved forest in Wuyanling National Natural Reserve, Zhejiang, China.

| Species                                               | Family           | Life form | Mycorrhizal type | No. individuals |
|-------------------------------------------------------|------------------|-----------|------------------|-----------------|
| <i>Acer amplum</i>                                    | Sapindaceae      | C         | AM               | 26              |
| <i>Acer cordatum</i>                                  | Sapindaceae      | C         | AM               | 129             |
| <i>Acer davidii</i>                                   | Sapindaceae      | C         | AM               | 65              |
| <i>Acer elegantulum</i>                               | Sapindaceae      | C         | AM               | 64              |
| <i>Acer wilsonii</i>                                  | Sapindaceae      | C         | AM               | 26              |
| <i>Adinandra glischroloma</i> var. <i>macrosepala</i> | Pentaphylacaceae | S         | AM               | 178             |
| <i>Albizia kalkora</i>                                | Fabaceae         | C         | AM               | 3               |
| <i>Alniphyllum fortunei</i>                           | Styracaceae      | C         | AM               | 263             |
| <i>Betula luminifera</i>                              | Betulaceae       | C         | EcM              | 8               |
| <i>Camellia chekiangoleosa</i>                        | Theaceae         | U         | AM               | 920             |
| <i>Camellia cuspidata</i>                             | Theaceae         | S         | AM               | 3225            |
| <i>Carpinus polyneura</i>                             | Betulaceae       | C         | EcM              | 3               |
| <i>Carpinus viminea</i>                               | Betulaceae       | C         | EcM              | 426             |
| <i>Castanopsis eyrei</i>                              | Fagaceae         | C         | EcM              | 1291            |
| <i>Castanopsis fabri</i>                              | Fagaceae         | C         | EcM              | 55              |
| <i>Castanopsis fargesii</i>                           | Fagaceae         | C         | EcM              | 1               |
| <i>Castanopsis tibetana</i>                           | Fagaceae         | C         | EcM              | 11              |
| <i>Celtis biondii</i>                                 | Cannabaceae      | C         | AM               | 6               |
| <i>Choerospondias axillaris</i>                       | Anacardiaceae    | C         | AM               | 7               |
| <i>Cinnamomum austrosinense</i>                       | Lauraceae        | C         | AM               | 1               |
| <i>Cinnamomum japonicum</i>                           | Lauraceae        | C         | AM               | 25              |
| <i>Cinnamomum subavenium</i>                          | Lauraceae        | C         | AM               | 385             |
| <i>Clerodendrum cyrtophyllum</i>                      | Lamiaceae        | U         | AM               | 2               |
| <i>Clerodendrum kaichianum</i>                        | Lamiaceae        | U         | AM               | 2               |
| <i>Clethra barbinervis</i>                            | Clethraceae      | U         | AM               | 12              |
| <i>Clethra delavayi</i>                               | Clethraceae      | U         | AM               | 3               |
| <i>Cleyera japonica</i>                               | Pentaphylacaceae | U         | AM               | 520             |
| <i>Cleyera pachyphylla</i>                            | Pentaphylacaceae | U         | AM               | 2               |
| <i>Cornus controversa</i>                             | Cornaceae        | C         | AM               | 2               |
| <i>Cornus hongkongensis</i> subsp. <i>elegans</i>     | Cornaceae        | U         | AM               | 556             |
| <i>Cryptomeria japonica</i> var. <i>sinensis</i>      | Cupressaceae     | C         | AM               | 5               |
| <i>Cunninghamia lanceolata</i>                        | Cupressaceae     | C         | AM               | 195             |
| <i>Cyclocarya paliurus</i>                            | Juglandaceae     | C         | AM               | 18              |
| <i>Dalbergia hupeana</i>                              | Fabaceae         | C         | AM               | 7               |
| <i>Daphniphyllum macropodum</i>                       | Daphniphyllac    | U         | AM               | 32              |

|                                                  |                 |   |     |      |
|--------------------------------------------------|-----------------|---|-----|------|
|                                                  | eae             |   |     |      |
| <i>Daphniphyllum oldhamii</i>                    | Daphniphyllac   | C | AM  | 76   |
|                                                  | eae             |   |     |      |
| <i>Dendropanax dentiger</i>                      | Araliaceae      | U | AM  | 496  |
| <i>Diospyros japonica</i>                        | Ebenaceae       | C | AM  | 9    |
| <i>Diospyros morrisiana</i>                      | Ebenaceae       | C | AM  | 1    |
| <i>Diospyros tsangii</i>                         | Ebenaceae       | U | AM  | 8    |
| <i>emmenopterys henryi</i>                       | Rubiaceae       | C | AM  | 1    |
| <i>Elaeagnus glabra</i>                          | Elaeagnaceae    | S | AM  | 1    |
| <i>Elaeocarpus decipiens</i>                     | Elaeocarpacea   | C | AM  | 4    |
|                                                  | e               |   |     |      |
| <i>Elaeocarpus japonicus</i>                     | Elaeocarpacea   | C | AM  | 120  |
|                                                  | e               |   |     |      |
| <i>Erythroxylum sinense</i>                      | Erythroxylaceae | U | AM  | 5    |
|                                                  | e               |   |     |      |
| <i>Euonymus laxiflorus</i>                       | Celastraceae    | S | AM  | 1    |
| <i>Euonymus myrianthus</i>                       | Celastraceae    | U | AM  | 35   |
| <i>Euonymus nitidus</i>                          | Celastraceae    | S | AM  | 7    |
| <i>Eurya alata</i>                               | Pentaphylacac   | S | AM  | 15   |
|                                                  | eae             |   |     |      |
| <i>Eurya hebeclados</i>                          | Pentaphylacac   | U | AM  | 6    |
|                                                  | eae             |   |     |      |
| <i>Eurya loquaiana</i>                           | Pentaphylacac   | U | AM  | 315  |
|                                                  | eae             |   |     |      |
| <i>Eurya loquaiana</i> var. <i>aureopunctata</i> | Pentaphylacac   | U | AM  | 42   |
|                                                  | eae             |   |     |      |
| <i>Eurya muricata</i>                            | Pentaphylacac   | S | AM  | 1355 |
|                                                  | eae             |   |     |      |
| <i>Eurya nitida</i>                              | Pentaphylacac   | S | AM  | 6    |
|                                                  | eae             |   |     |      |
| <i>Eurya rubiginosa</i> var. <i>attenuata</i>    | Pentaphylacac   | S | AM  | 4226 |
|                                                  | eae             |   |     |      |
| <i>Fagus engleriana</i>                          | Fagaceae        | C | EcM | 72   |
| <i>Fagus lucida</i>                              | Fagaceae        | C | EcM | 13   |
| <i>Ficus heteromorpha</i>                        | Moraceae        | U | AM  | 2    |
| <i>Fraxinus chinensis</i>                        | Oleaceae        | C | AM  | 9    |
| <i>Fraxinus insularis</i>                        | Oleaceae        | C | AM  | 3    |
| <i>Gardenia jasminoides</i>                      | Rubiaceae       | S | AM  | 40   |
| <i>Halesia macgregorii</i>                       | Styracaceae     | C | AM  | 363  |
| <i>Hovenia trichocarpa</i> var. <i>robusta</i>   | Rhamnaceae      | C | AM  | 10   |
| <i>Hydrangea chinensis</i>                       | Hydrangeaceae   | S | AM  | 7    |
| <i>Hydrangea strigosa</i>                        | Hydrangeaceae   | S | AM  | 1    |
| <i>Idesia polycarpa</i>                          | Salicaceae      | C | AM  | 8    |
| <i>Ilex buergeri</i>                             | Aquifoliaceae   | U | AM  | 25   |

|                                                |                |   |     |      |
|------------------------------------------------|----------------|---|-----|------|
| <i>Ilex chinensis</i>                          | Aquifoliaceae  | C | AM  | 40   |
| <i>Ilex crenata</i>                            | Aquifoliaceae  | S | AM  | 3    |
| <i>Ilex elmerrilliana</i>                      | Aquifoliaceae  | U | AM  | 7    |
| <i>Ilex ficoidea</i>                           | Aquifoliaceae  | C | AM  | 839  |
| <i>Ilex formosana</i>                          | Aquifoliaceae  | C | AM  | 31   |
| <i>Ilex kwangtungensis</i>                     | Aquifoliaceae  | U | AM  | 75   |
| <i>Ilex latifolia</i>                          | Aquifoliaceae  | C | AM  | 34   |
| <i>Ilex litseifolia</i>                        | Aquifoliaceae  | U | AM  | 758  |
| <i>Ilex lohfauiensis</i>                       | Aquifoliaceae  | U | AM  | 3    |
| <i>Ilex micrococca</i>                         | Aquifoliaceae  | C | AM  | 36   |
| <i>Ilex nitidissima</i>                        | Aquifoliaceae  | U | AM  | 3    |
| <i>Ilex rotunda</i>                            | Aquifoliaceae  | C | AM  | 52   |
| <i>Ilex suaveolens</i>                         | Aquifoliaceae  | C | AM  | 149  |
| <i>Ilex triflora</i>                           | Aquifoliaceae  | U | AM  | 1    |
| <i>Ilex triflora</i> var. <i>kanehirai</i>     | Aquifoliaceae  | U | AM  | 26   |
| <i>Ilex wilsonii</i>                           | Aquifoliaceae  | C | AM  | 968  |
| <i>Illicium lanceolatum</i>                    | Schisandraceae | U | AM  | 3    |
| <i>Itea omeiensis</i>                          | Iteaceae       | S | AM  | 567  |
| <i>Lagerstroemia subcostata</i>                | Lythraceae     | C | AM  | 7    |
| <i>Lasianthus japonicus</i>                    | Rubiaceae      | S | AM  | 4    |
| <i>Ligustrum leucanthum</i>                    | Oleaceae       | U | AM  | 2    |
| <i>Lindera aggregata</i>                       | Lauraceae      | S | AM  | 448  |
| <i>Lindera erythrocarpa</i>                    | Lauraceae      | U | AM  | 2    |
| <i>Liquidambar acalycina</i>                   | Altingiaceae   | C | AM  | 153  |
| <i>Lithocarpus brevicaudatus</i>               | Fagaceae       | C | EcM | 473  |
| <i>Lithocarpus hancei</i>                      | Fagaceae       | C | EcM | 50   |
| <i>Lithocarpus iteaphyllus</i>                 | Fagaceae       | C | EcM | 528  |
| <i>Lithocarpus litseifolius</i>                | Fagaceae       | C | EcM | 65   |
| <i>Litsea elongata</i>                         | Lauraceae      | C | AM  | 119  |
| <i>Litsea elongata</i> var. <i>faberi</i>      | Lauraceae      | C | AM  | 550  |
| <i>Lyonia ovalifolia</i> var. <i>hebecarpa</i> | Ericaceae      | U | ErM | 1    |
| <i>Machilus leptophylla</i>                    | Lauraceae      | C | AM  | 16   |
| <i>Machilus litseifolia</i>                    | Lauraceae      | C | AM  | 21   |
| <i>Machilus pauhoi</i>                         | Lauraceae      | C | AM  | 9    |
| <i>Machilus phoenicis</i>                      | Lauraceae      | U | AM  | 1660 |
| <i>Machilus thunbergii</i>                     | Lauraceae      | C | AM  | 1262 |
| <i>Mallotus tenuifolius</i>                    | Euphorbiaceae  | U | AM  | 1    |
| <i>Malus leiocalyca</i>                        | Rosaceae       | C | AM  | 59   |
| <i>Manglietia yuyuanensis</i>                  | Magnoliaceae   | C | AM  | 311  |
| <i>Meliosma flexuosa</i>                       | Sabiaceae      | U | AM  | 59   |
| <i>Meliosma myriantha</i> var. <i>discolor</i> | Sabiaceae      | C | AM  | 16   |
| <i>Meliosma oldhamii</i>                       | Sabiaceae      | C | AM  | 451  |
| <i>Metasequoia glyptostroboides</i>            | Cupressaceae   | C | AM  | 2    |
| <i>Michelia maudiae</i>                        | Magnoliaceae   | C | AM  | 491  |

|                                                   |                |   |     |      |
|---------------------------------------------------|----------------|---|-----|------|
| <i>Microtropis fokienensis</i>                    | Celastraceae   | S | AM  | 6    |
| <i>Morella rubra</i>                              | Myricaceae     | C | AM  | 21   |
| <i>Neolitsea aurata</i> var. <i>chekiangensis</i> | Lauraceae      | U | AM  | 2368 |
| <i>Neolitsea aurata</i> var. <i>paraciculata</i>  | Lauraceae      | U | AM  | 90   |
| <i>Neolitsea aurata</i> var. <i>undulatula</i>    | Lauraceae      | U | AM  | 110  |
| <i>Nyssa sinensis</i>                             | Nyssaceae      | C | AM  | 229  |
| <i>Osmanthus austrozhejiangensis</i>              | Oleaceae       | U | AM  | 314  |
| <i>Osmanthus matsumuranus</i>                     | Oleaceae       | U | AM  | 3    |
| <i>Parakmeria lotungensis</i>                     | Magnoliaceae   | C | AM  | 4    |
| <i>Phoebe sheareri</i>                            | Lauraceae      | C | AM  | 24   |
| <i>Photinia beauverdiana</i>                      | Rosaceae       | U | AM  | 66   |
| <i>Photinia glabra</i>                            | Rosaceae       | U | AM  | 943  |
| <i>Photinia parvifolia</i>                        | Rosaceae       | U | AM  | 24   |
| <i>Photinia serratifolia</i>                      | Rosaceae       | U | AM  | 7    |
| <i>Photinia villosa</i>                           | Rosaceae       | U | AM  | 48   |
| <i>Picrasma quassioides</i>                       | Simaroubaceae  | C | AM  | 3    |
| <i>Pieris japonica</i>                            | Ericaceae      | U | ErM | 109  |
| <i>Pinus hwangshanensis</i>                       | Pinaceae       | C | EcM | 12   |
| <i>Pinus massoniana</i>                           | Pinaceae       | C | EcM | 3    |
| <i>Pittosporum illicioides</i>                    | Pittosporaceae | S | AM  | 5    |
| <i>Platycarya strobilacea</i>                     | Juglandaceae   | U | EcM | 2    |
| <i>Prunus conradinae</i>                          | Rosaceae       | C | AM  | 3    |
| <i>Prunus phaeosticta</i>                         | Rosaceae       | U | AM  | 9    |
| <i>Prunus schneideriana</i>                       | Rosaceae       | U | AM  | 115  |
| <i>Prunus spinulosa</i>                           | Rosaceae       | C | AM  | 12   |
| <i>Quercus engleriana</i>                         | Fagaceae       | U | EcM | 237  |
| <i>Quercus glauca</i>                             | Fagaceae       | C | EcM | 52   |
| <i>Quercus jenseniana</i>                         | Fagaceae       | C | EcM | 18   |
| <i>Quercus multinervis</i>                        | Fagaceae       | C | EcM | 90   |
| <i>Quercus myrsinifolia</i>                       | Fagaceae       | C | EcM | 268  |
| <i>Quercus sessilifolia</i>                       | Fagaceae       | C | EcM | 231  |
| <i>Quercus shennongii</i>                         | Fagaceae       | C | EcM | 27   |
| <i>Quercus stewardiana</i>                        | Fagaceae       | C | EcM | 1889 |
| <i>Raphiolepis indica</i>                         | Rosaceae       | U | AM  | 46   |
| <i>Rhododendron championiae</i>                   | Ericaceae      | U | ErM | 85   |
| <i>Rhododendron latouchaeae</i>                   | Ericaceae      | U | ErM | 4105 |
| <i>Rhododendron mariesii</i>                      | Ericaceae      | U | ErM | 1255 |
| <i>Rhododendron ovatum</i>                        | Ericaceae      | U | ErM | 2364 |
| <i>Rhododendron simsii</i>                        | Ericaceae      | S | ErM | 138  |
| <i>Sassafras tzumu</i>                            | Lauraceae      | C | AM  | 75   |
| <i>Schima superba</i>                             | Theaceae       | C | AM  | 1085 |
| <i>Schoepfia jasminodora</i>                      | Schoepfiaceae  | U | AM  | 33   |
| <i>Semiliquidambar caudata</i>                    | Altingiaceae   | C | AM  | 1    |
| <i>Sorbus folgneri</i>                            | Rosaceae       | C | AM  | 2    |

|                                                          |                  |   |     |     |
|----------------------------------------------------------|------------------|---|-----|-----|
| <i>Styrax dasyanthus</i>                                 | Styracaceae      | U | AM  | 31  |
| <i>Styrax odoratissimus</i>                              | Styracaceae      | U | AM  | 4   |
| <i>Styrax suberifolius</i>                               | Styracaceae      | C | AM  | 179 |
| <i>Symplocos anomala</i>                                 | Symplocaceae     | U | AM  | 414 |
| <i>Symplocos botryantha</i>                              | Symplocaceae     | U | AM  | 154 |
| <i>Symplocos chinensis</i>                               | Symplocaceae     | U | AM  | 2   |
| <i>Symplocos cochinchinensis</i> var.<br><i>laurina</i>  | Symplocaceae     | U | AM  | 24  |
| <i>Symplocos heishanensis</i>                            | Symplocaceae     | C | AM  | 137 |
| <i>Symplocos lancifolia</i>                              | Symplocaceae     | U | AM  | 5   |
| <i>Symplocos lucida</i>                                  | Symplocaceae     | U | AM  | 183 |
| <i>Symplocos pendula</i> var. <i>hirtistylis</i>         | Symplocaceae     | U | AM  | 7   |
| <i>Symplocos stellaris</i>                               | Symplocaceae     | U | AM  | 140 |
| <i>Symplocos sumuntia</i>                                | Symplocaceae     | U | AM  | 37  |
| <i>Syzygium buxifolium</i>                               | Myrtaceae        | U | AM  | 344 |
| <i>Taxus wallichiana</i> var. <i>mairei</i>              | Taxaceae         | C | AM  | 2   |
| <i>Ternstroemia gymnanthera</i>                          | Pentaphylacaceae | U | AM  | 838 |
| <i>Tetradium glabrifolium</i>                            | Rutaceae         | C | AM  | 3   |
| <i>Toxicodendron succedaneum</i>                         | Anacardiaceae    | C | AM  | 150 |
| <i>Vaccinium bracteatum</i>                              | Ericaceae        | U | ErM | 68  |
| <i>Vaccinium mandarinorum</i>                            | Ericaceae        | S | ErM | 378 |
| <i>Viburnum erosum</i>                                   | Adoxaceae        | S | AM  | 83  |
| <i>Viburnum sempervirens</i> var.<br><i>trichophorum</i> | Adoxaceae        | S | AM  | 31  |
| <i>Viburnum sympodiale</i>                               | Adoxaceae        | U | AM  | 17  |
| <i>Yulania cylindrica</i>                                | Magnoliaceae     | C | AM  | 10  |

Table S2. Optimal scales and  $c$  for survival and relative growth rate (RGR) of all individuals and tree mycorrhizal types at sapling and adult life stages at 5-30m.

|          |                  | $c$     |       | Scale (m) |       |
|----------|------------------|---------|-------|-----------|-------|
|          |                  | Sapling | Adult | Sapling   | Adult |
| Survival | All individuals  | 0.3     | 0.3   | 10        | 10    |
|          | AM tree species  | 0.3     | 1.0   | 10        | 9     |
|          | EcM tree species | 0.2     | 0.2   | 20        | 25    |
|          | ErM tree species | 0.7     | 0.1   | 30        | 28    |
| RGR      | All individuals  | 0.3     | 0.3   | 6         | 8     |
|          | AM tree species  | 0.5     | 0.5   | 5         | 7     |
|          | EcM tree species | 0.7     | 0.9   | 9         | 30    |
|          | ErM tree species | 0.6     | 0.1   | 10        | 19    |

Table S3. Coefficient estimates of the correlation between  $BA_{EcM}$  and  $BA_{AM}$  with species diversity, average RGR, total BA and increment of total BA. BA, basal area;  $BA_{EcM}$ , BA of EcM tree species;  $BA_{AM}$ , BA of AM tree species; RGR, relative growth rates.

| Response variable     | Explanatory variable | <i>Estimates</i> | <i>SE.</i> | <i>P</i> |
|-----------------------|----------------------|------------------|------------|----------|
| Species diversity     | $BA_{EcM}$           | 0.017            | 0.003      | 0.000    |
|                       | $BA_{EcM}^2$         | 0.000            | 0.000      | 0.000    |
| Average RGR           | $BA_{EcM}$           | 0.003            | 0.001      | 0.006    |
|                       | $BA_{EcM}^2$         | 0.000            | 0.000      | 0.013    |
| Total BA              | $BA_{EcM}$           | 0.019            | 0.002      | 0.000    |
| Increment of total BA | $BA_{EcM}$           | 0.002            | 0.000      | 0.000    |
|                       | $BA_{AM}$            | 0.029            | 0.003      | 0.000    |
| Species diversity     | $BA_{AM}^2$          | 0.000            | 0.000      | 0.000    |
|                       | $BA_{AM}$            | 0.002            | 0.001      | 0.082    |
| Average RGR           | $BA_{AM}^2$          | 0.000            | 0.000      | 0.040    |
|                       | $BA_{AM}$            | -0.018           | 0.001      | 0.000    |
| Total BA              | $BA_{AM}$            | -0.002           | 0.000      | 0.000    |
| Increment of total BA | $BA_{AM}$            |                  |            |          |

Table S4. Coefficient estimates of the correlation between the square root of  $R_{EA}$  ( $\sqrt{R_{EA}}$ ) with species diversity, average RGR, total BA and increment of total BA. RGR, relative growth rates; BA, basal area;  $R_{EA}$ , the ratio of BA of EcM to BA of AM tree species.

| Response variable     | Explanatory variable | <i>Estimates</i> | <i>SE.</i> | <i>P</i> |
|-----------------------|----------------------|------------------|------------|----------|
| Species diversity     | $\sqrt{R_{EA}}$      | 0.685            | 0.142      | 0.000    |
|                       | $R_{EA}$             | -0.447           | 0.070      | 0.000    |
| Average RGR           | $\sqrt{R_{EA}}$      | 0.143            | 0.055      | 0.009    |
|                       | $R_{EA}$             | -0.066           | 0.027      | 0.016    |
| Total BA              | $R_{EA}$             | 0.903            | 0.074      | 0.000    |
| Increment of total BA | $R_{EA}$             | 0.092            | 0.014      | 0.000    |
